# Supplementary material
Source: ML conference proceedings conference paper supplement (https://openreview.net/forum?id=J-ILMFGuSV)

Running time secs

- budget factor: 0.8
- budget factor: 1.0
- budget factor: 1.2
- budget factor: 1.6
- budget factor: 2.0

Number of Nodes

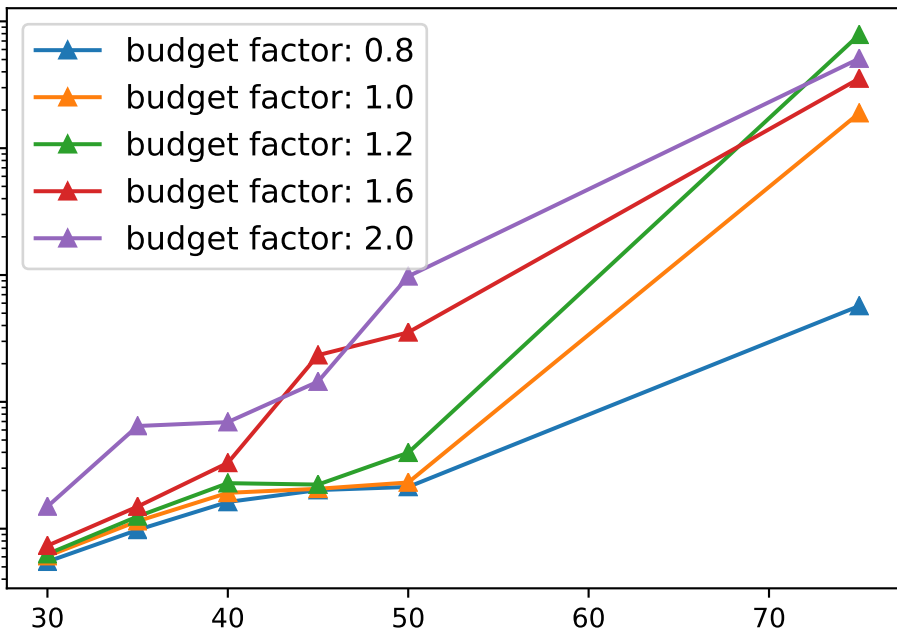

Supplement: supplementary_material [file attachment]
