# Supplementary material
Source: ML conference proceedings conference paper supplement (https://openreview.net/forum?id=J-ILMFGuSV)

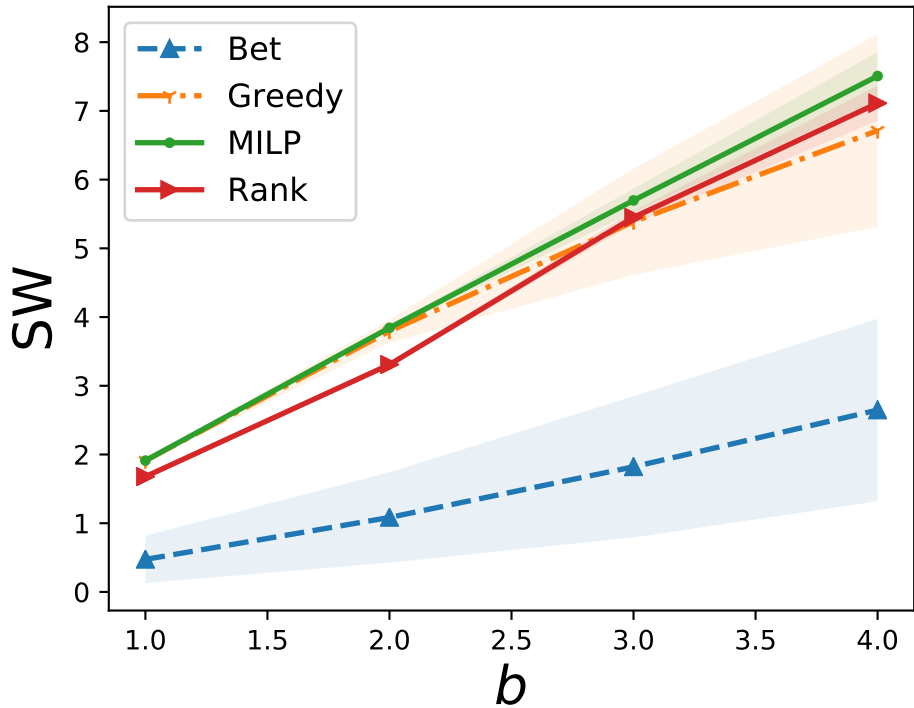

Supplement: supplementary_material [file attachment]

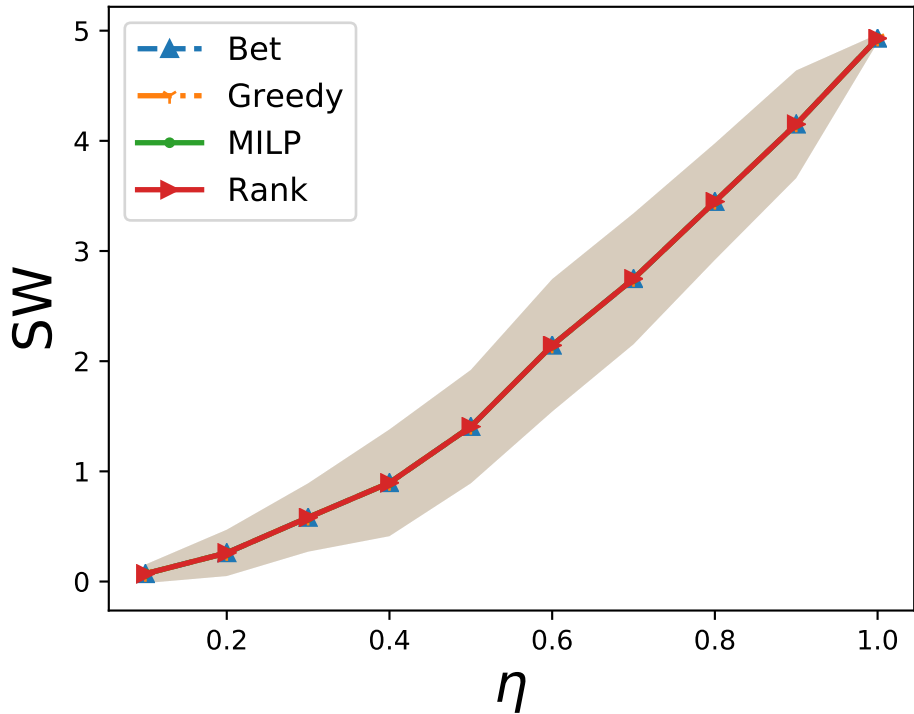

Supplement: supplementary_material [file attachment]

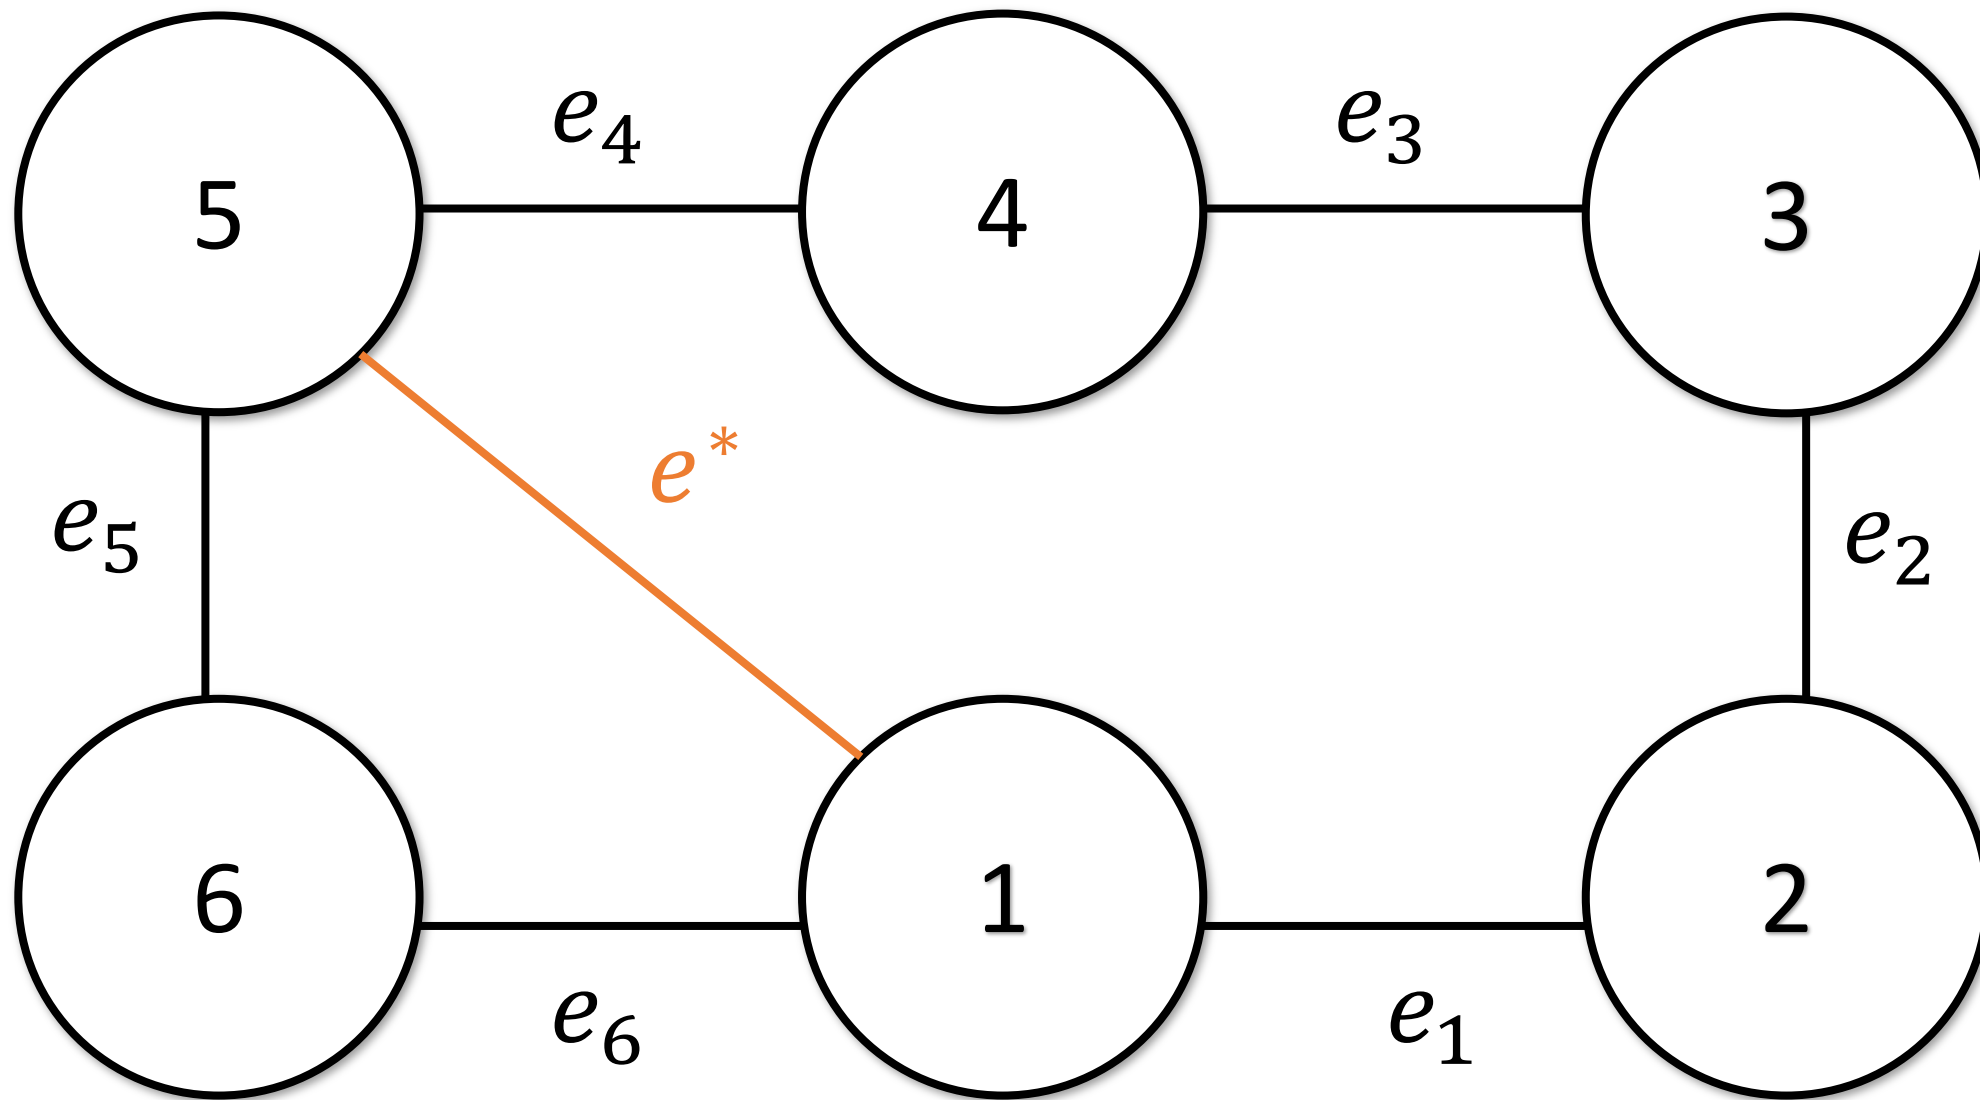

Supplement: supplementary_material [file attachment]

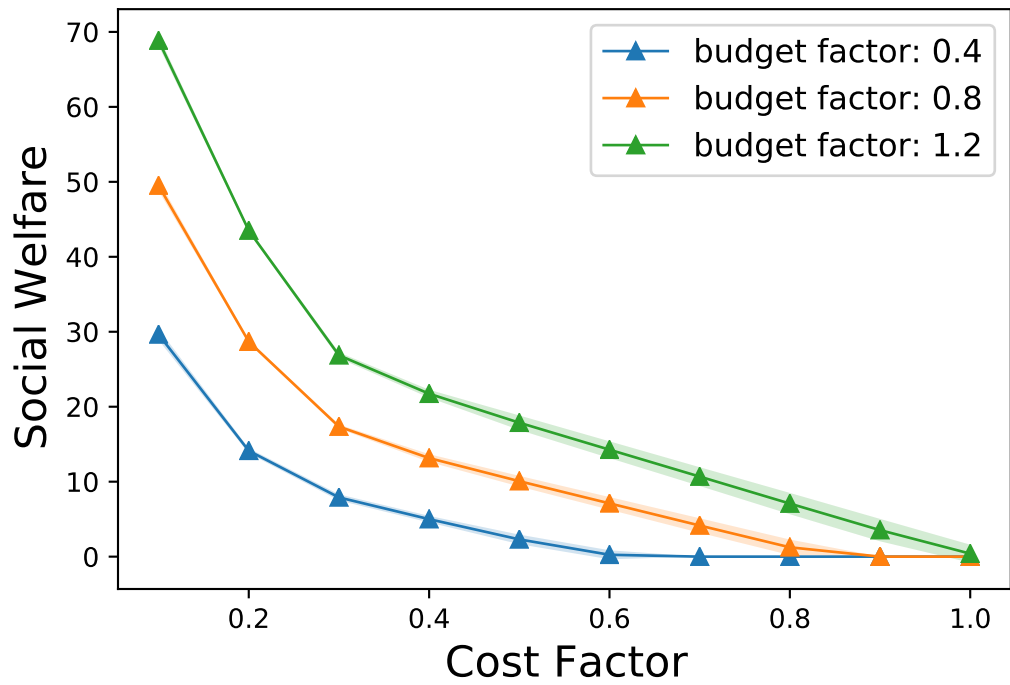

Supplement: supplementary_material [file attachment]

$\mathcal{G}_1^{\text{in}}$ 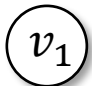 $e_{1,2}$ 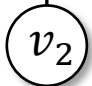 $\mathcal{G}_2^{\text{in}}$ 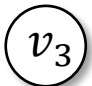 $e_{3,4}$ 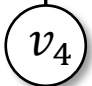 $\dots$  $\mathcal{G}_M^{\text{in}}$ 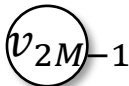 $e_{2M-1,2M}$ 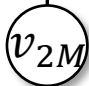

Supplement: supplementary_material [file attachment]

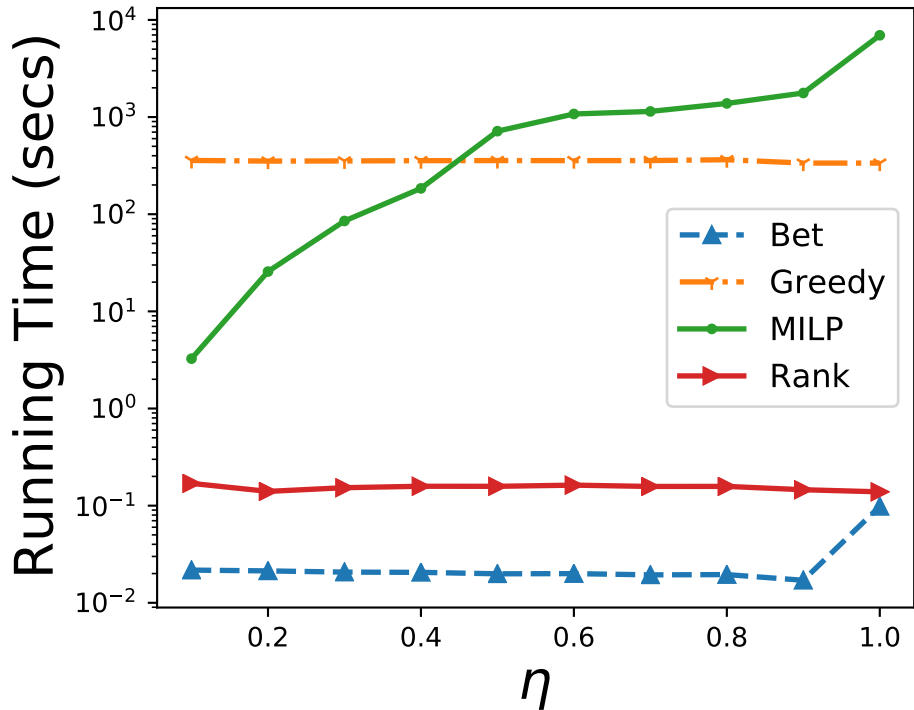

Supplement: supplementary_material [file attachment]

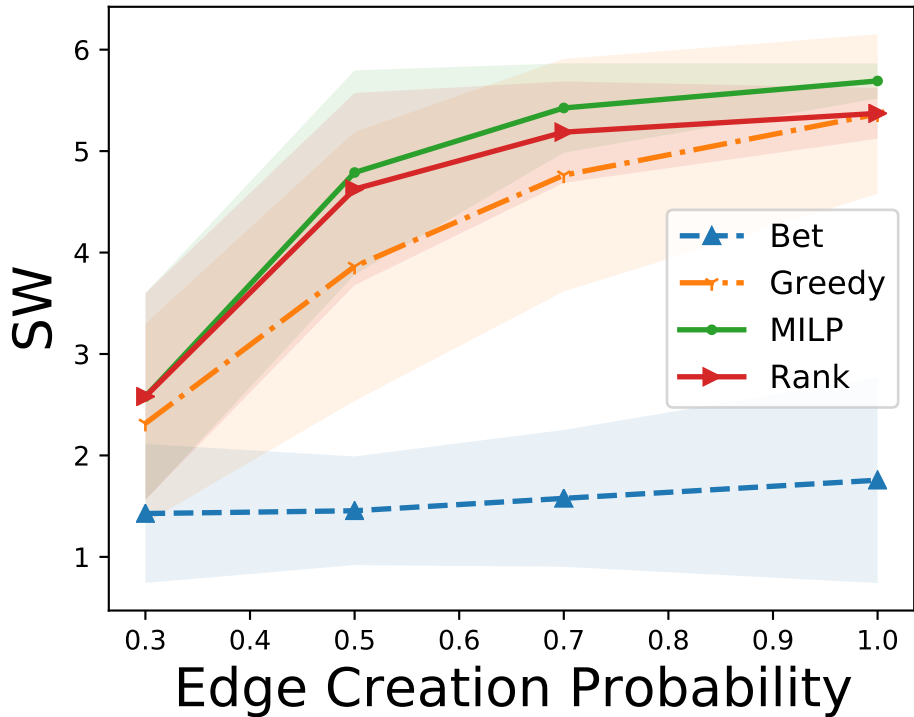

Supplement: supplementary_material [file attachment]

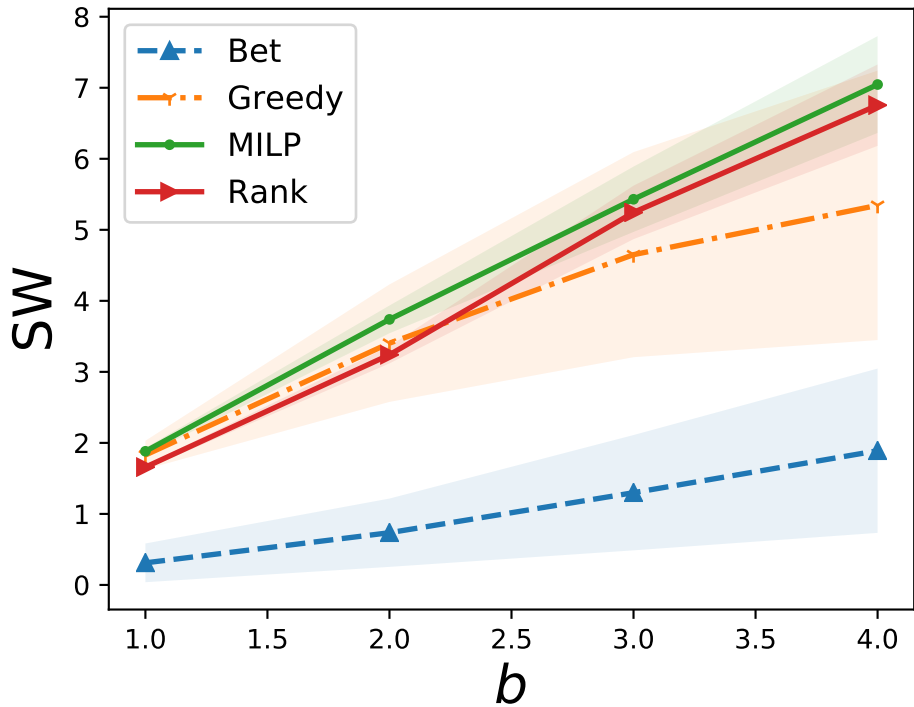

Supplement: supplementary_material [file attachment]

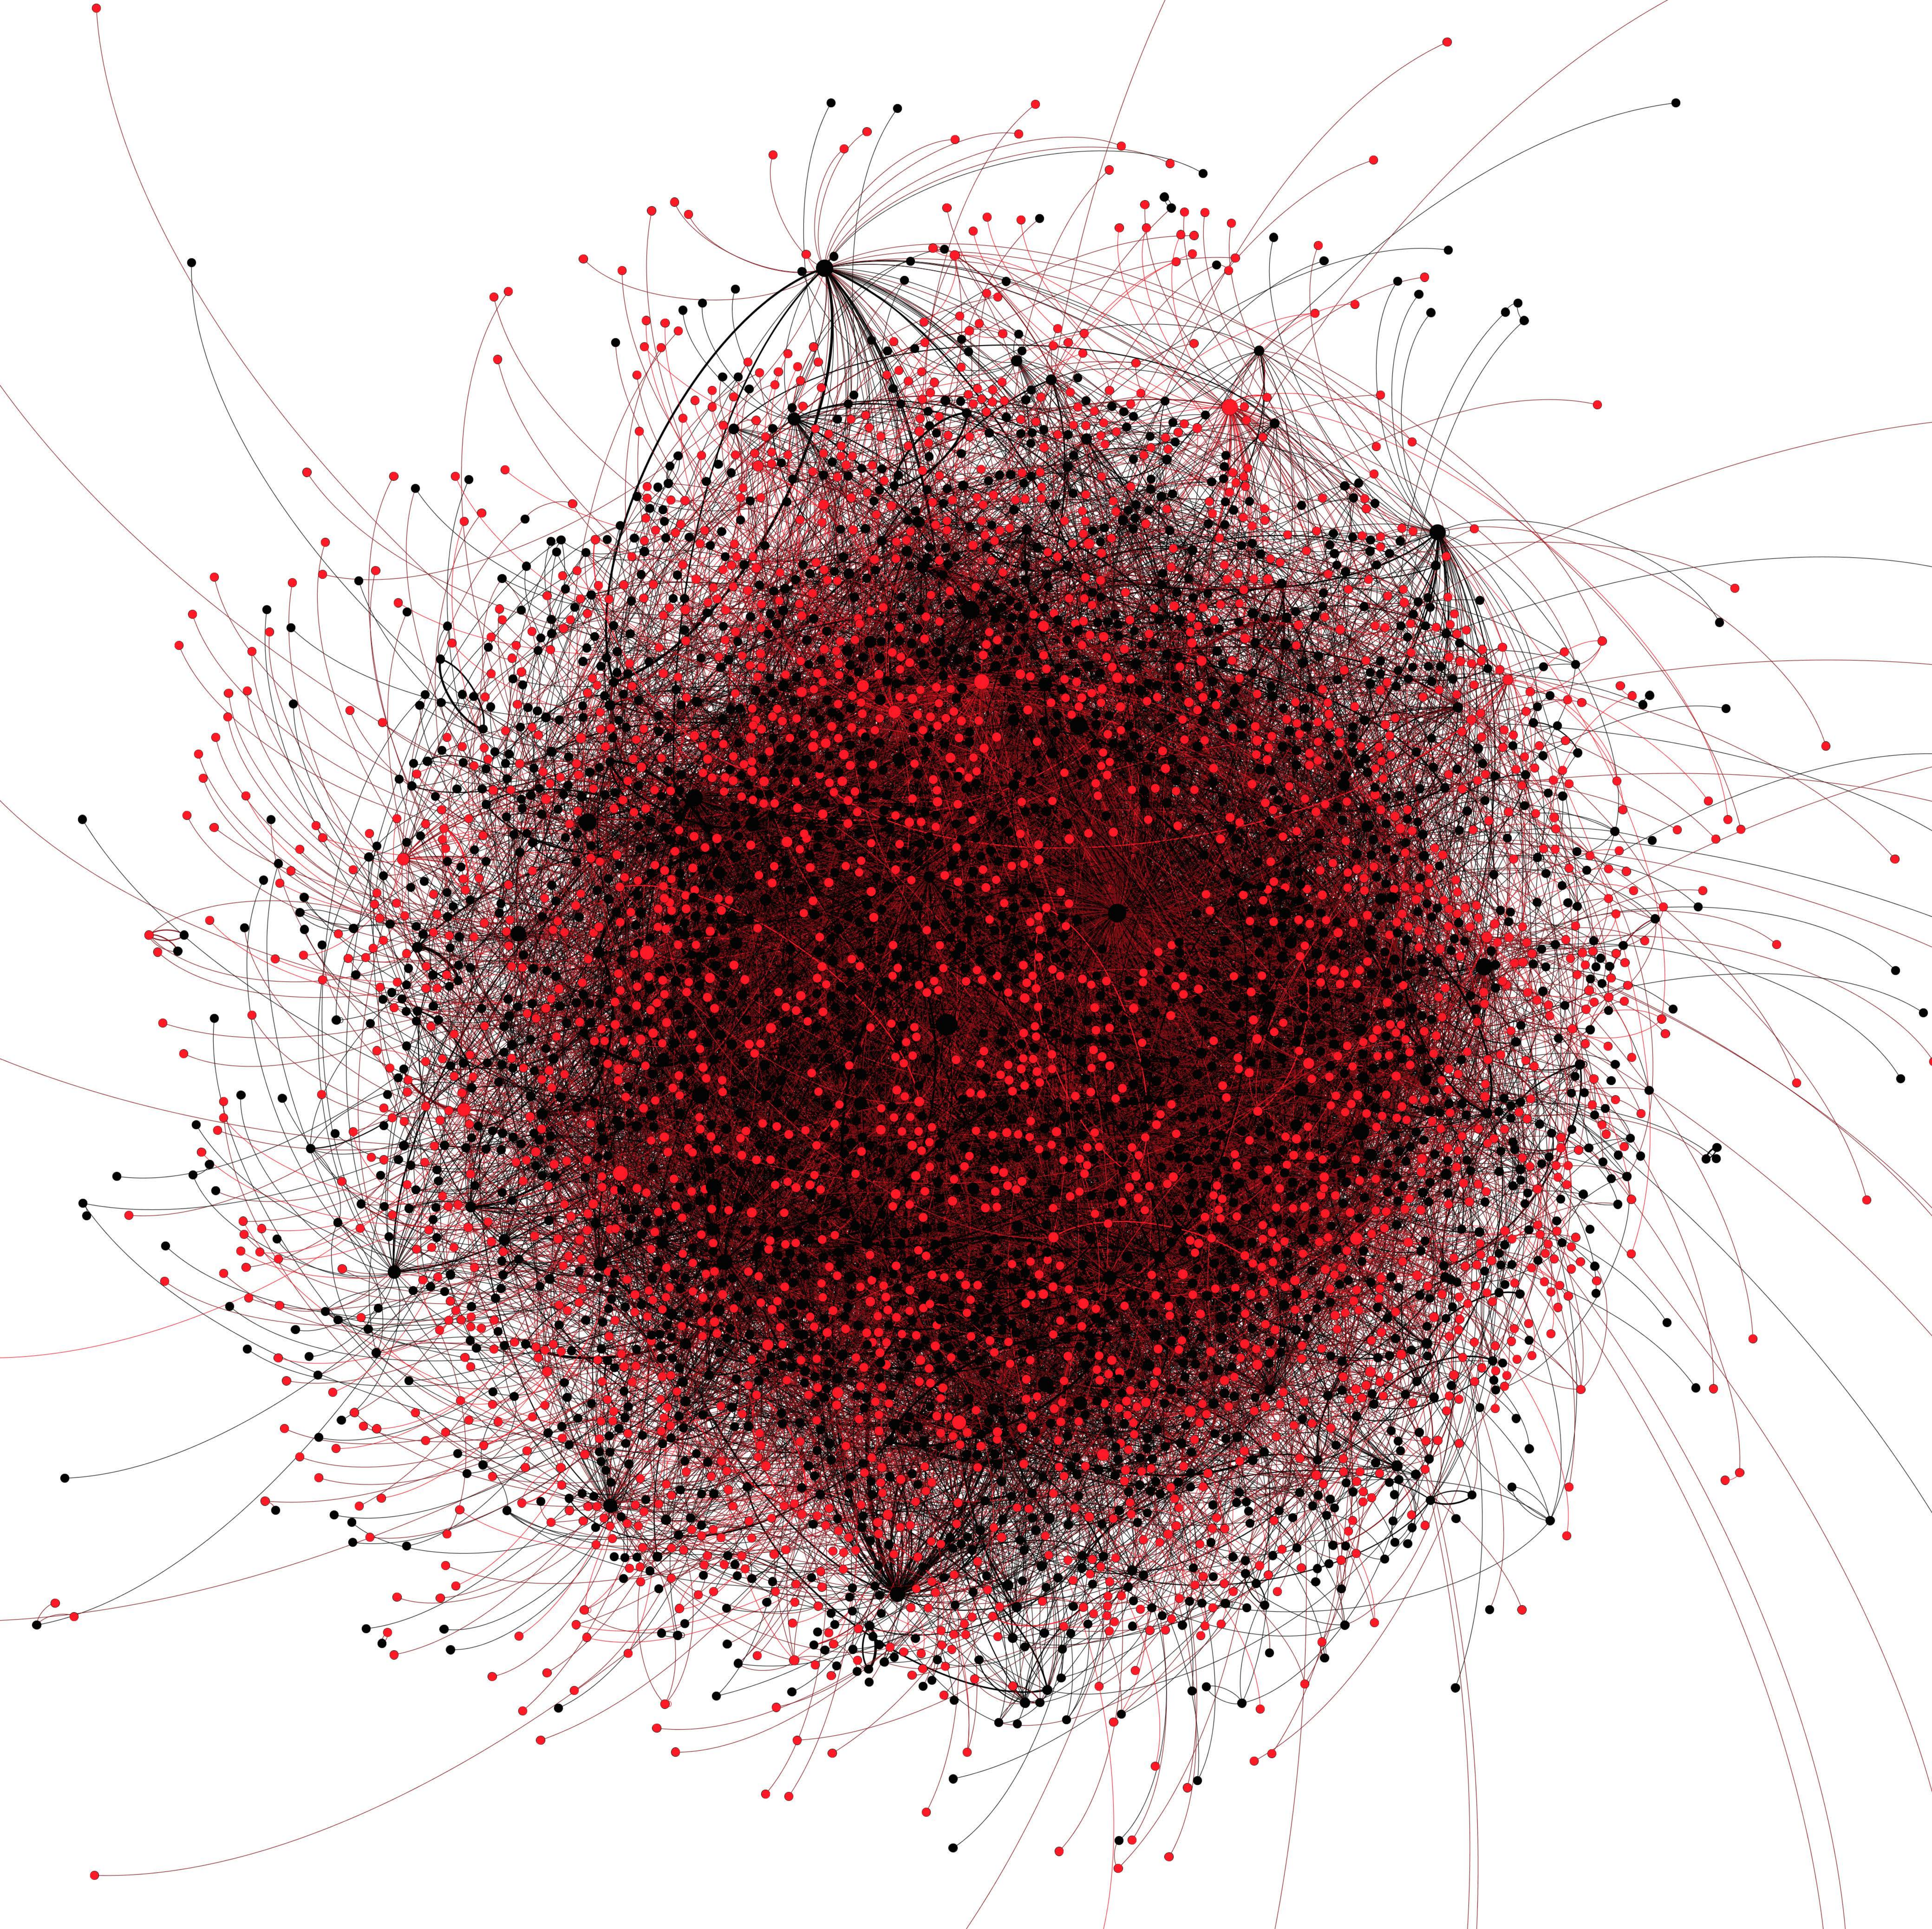

Supplement: supplementary_material [file attachment]

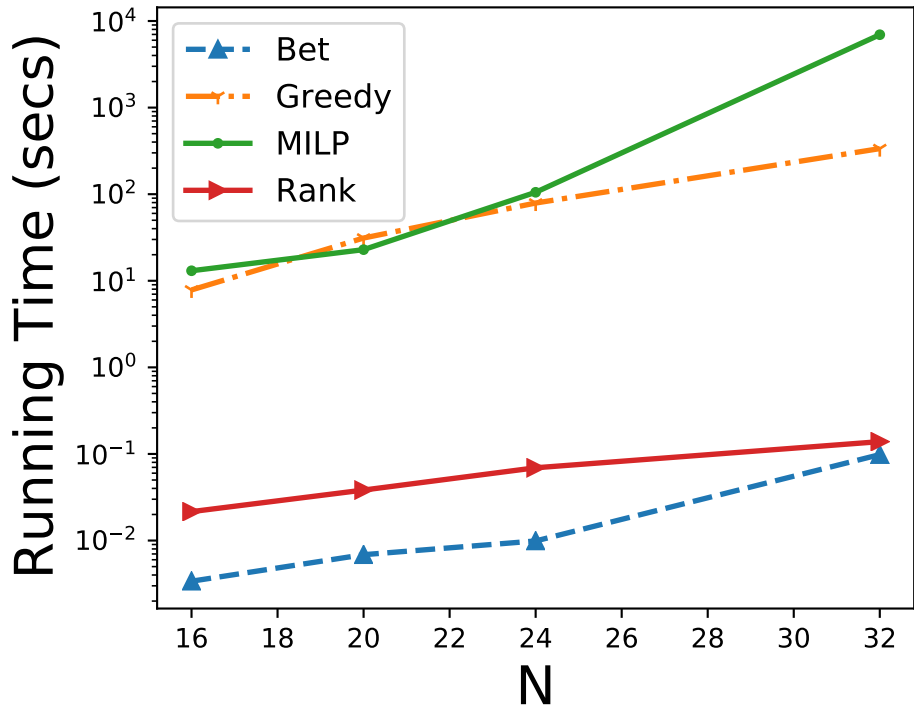

Supplement: supplementary_material [file attachment]

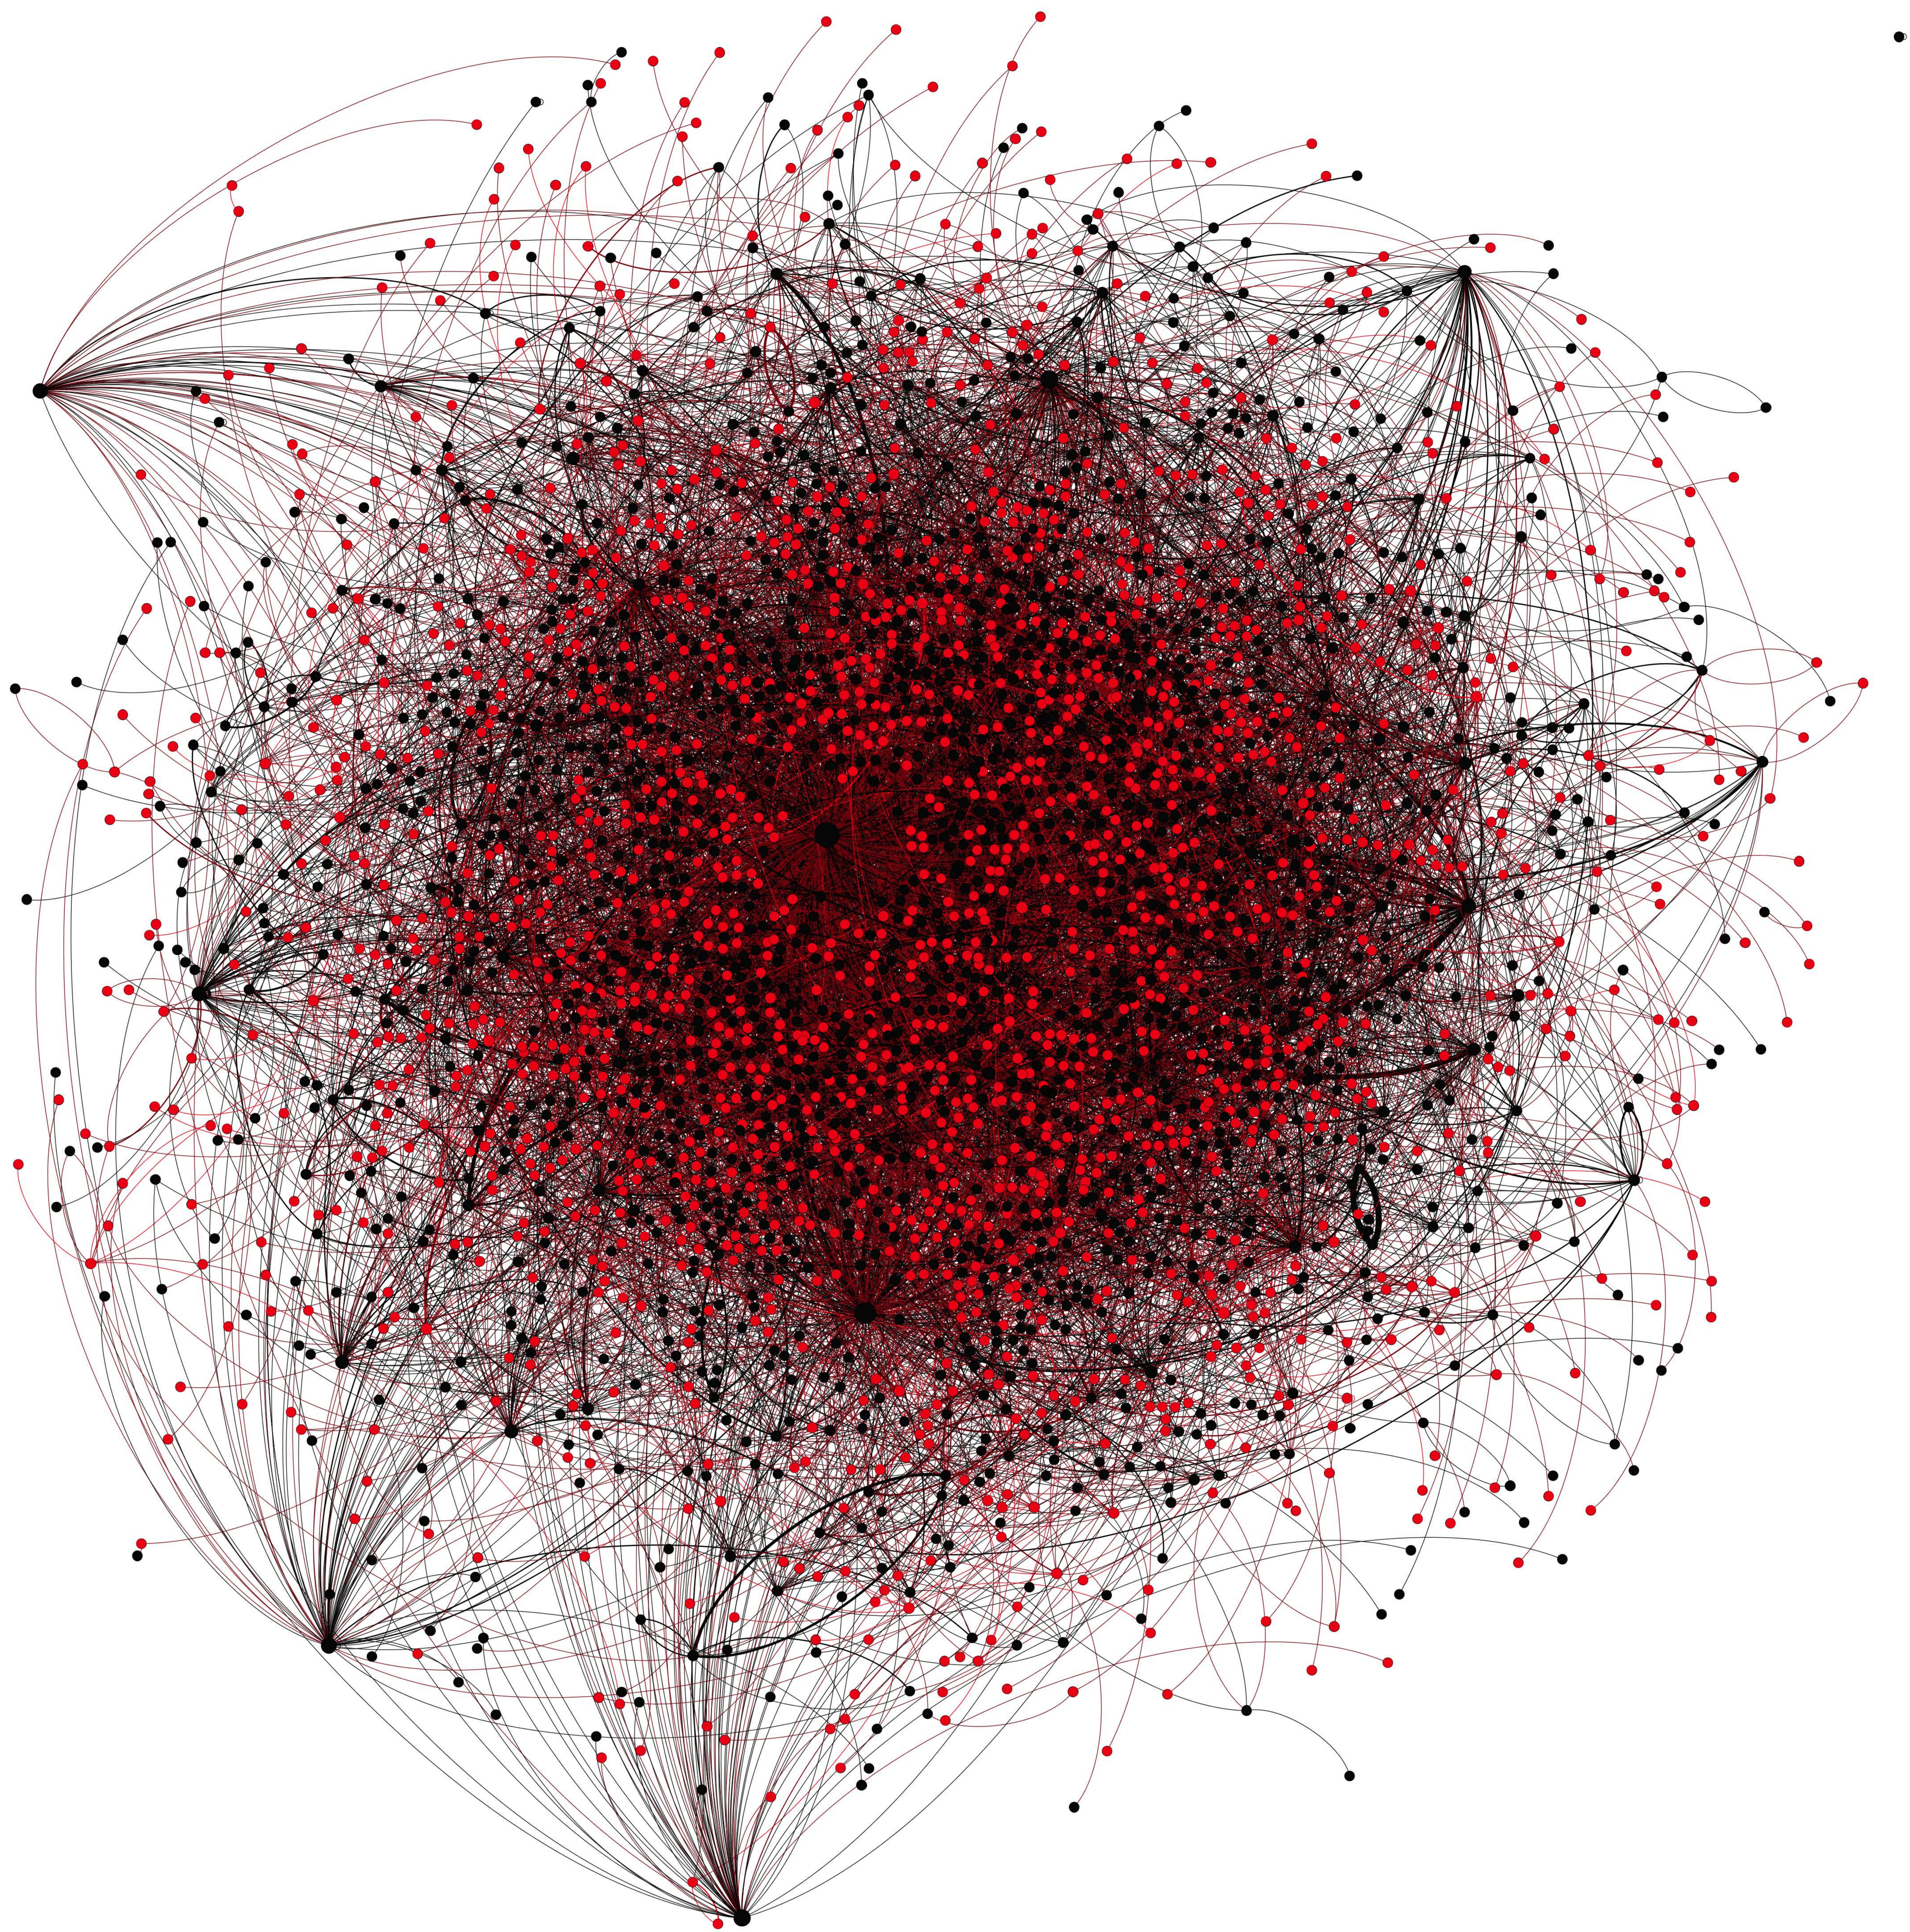

Supplement: supplementary_material [file attachment]

Self-disclosure Ratio

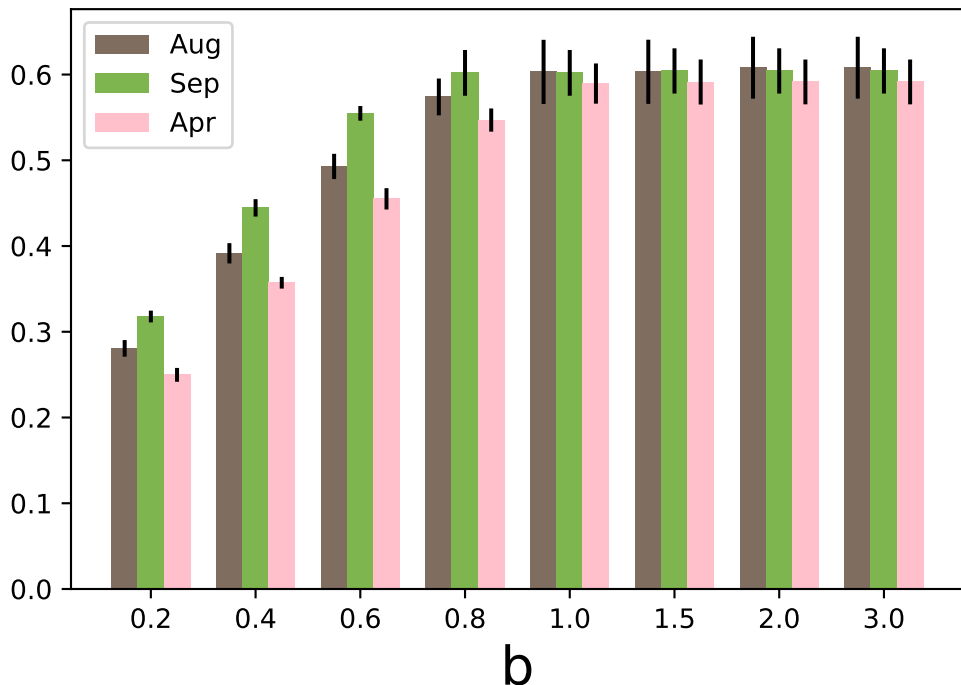

Supplement: supplementary_material [file attachment]



Supplement: supplementary_material [file attachment]

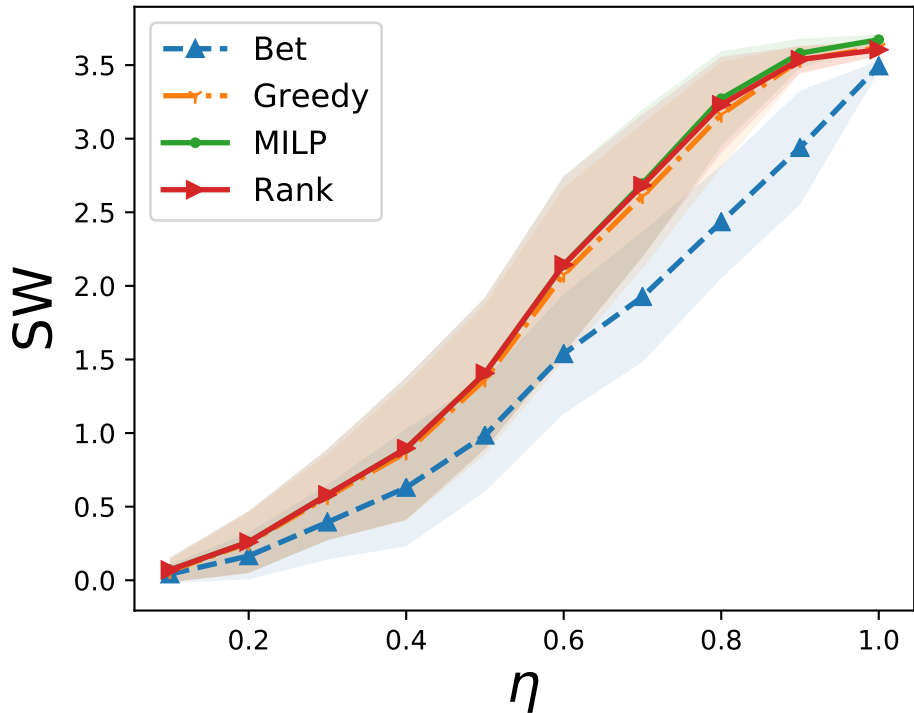

Supplement: supplementary_material [file attachment]

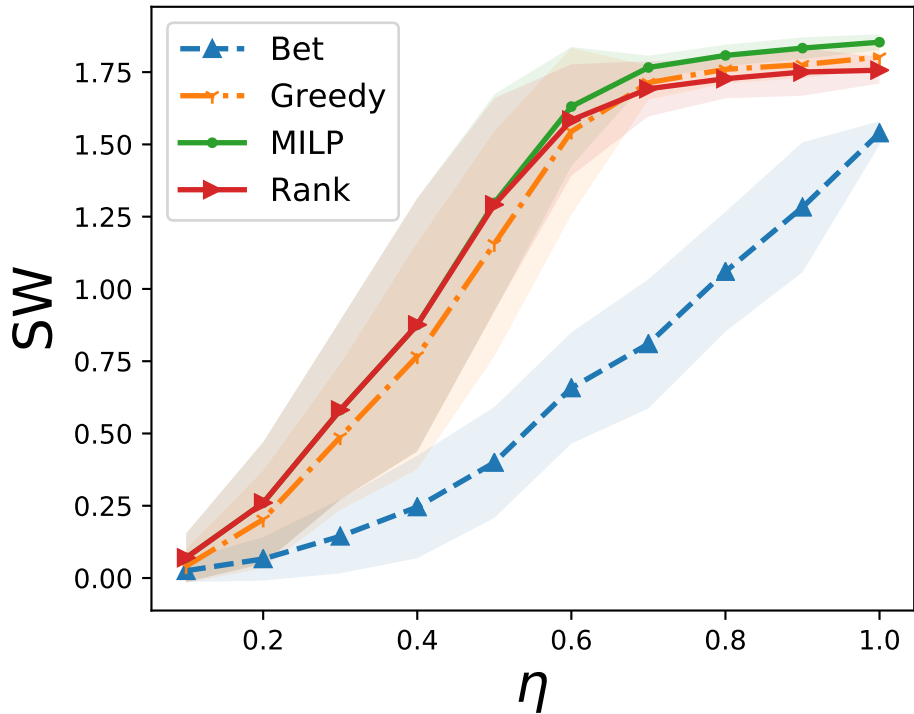

Supplement: supplementary_material [file attachment]

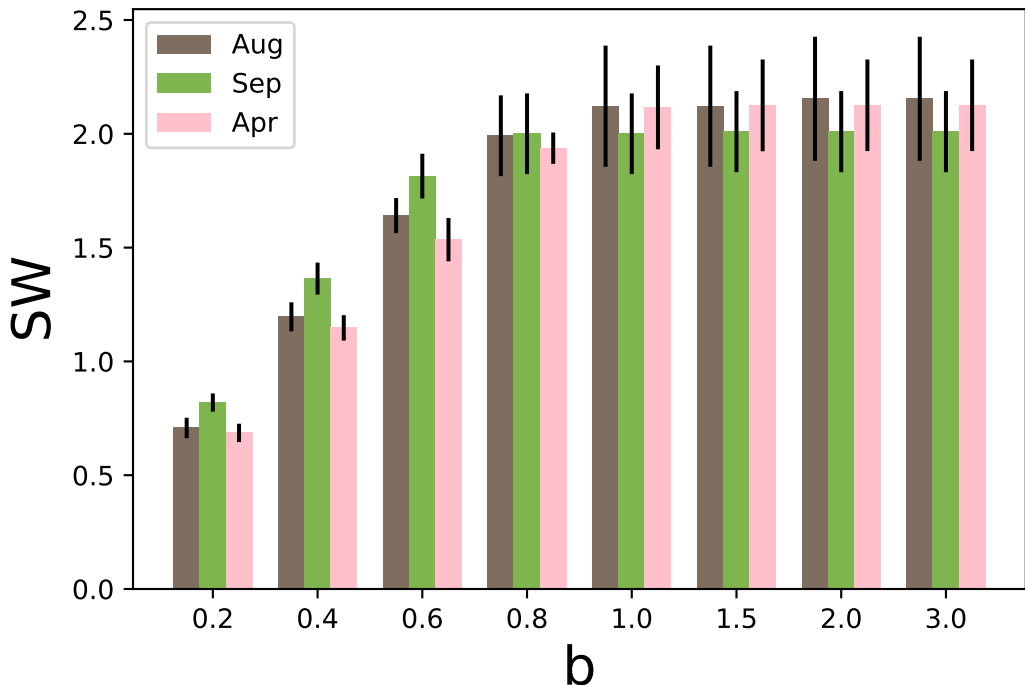

Supplement: supplementary_material [file attachment]

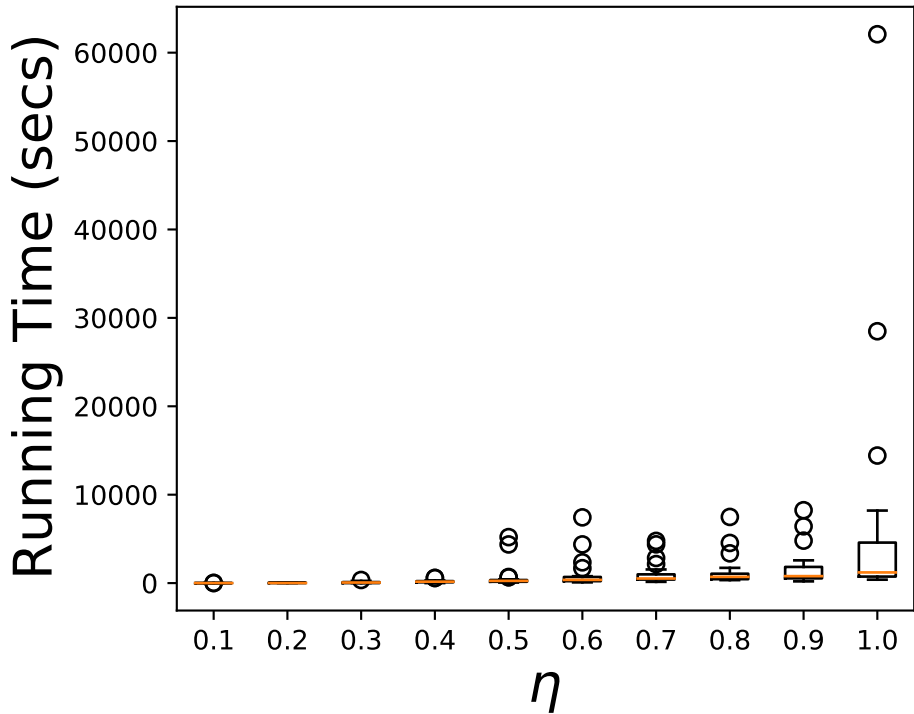

Supplement: supplementary_material [file attachment]

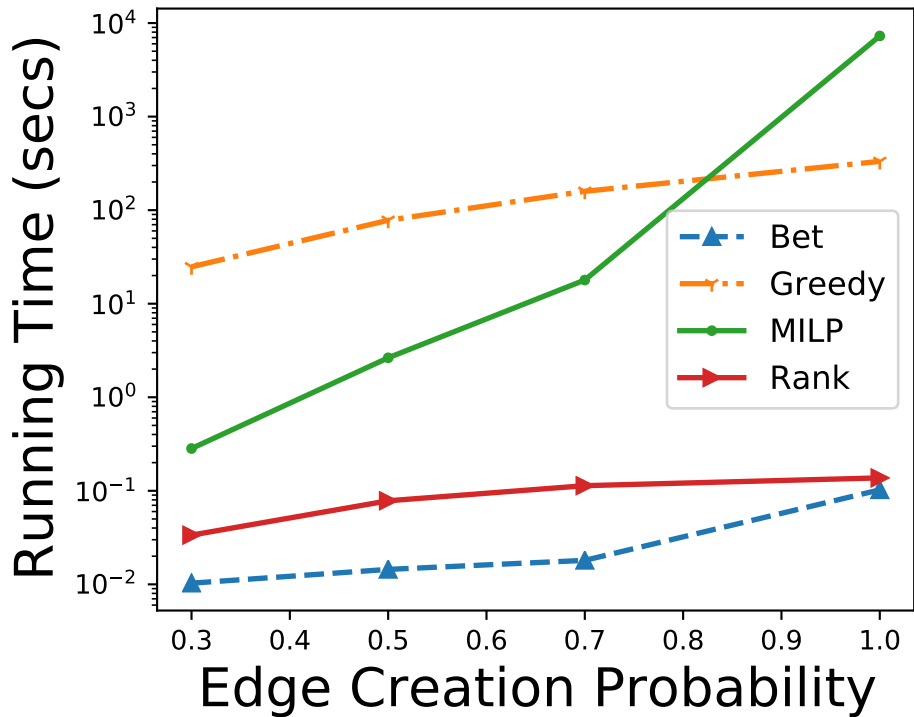

Supplement: supplementary_material [file attachment]

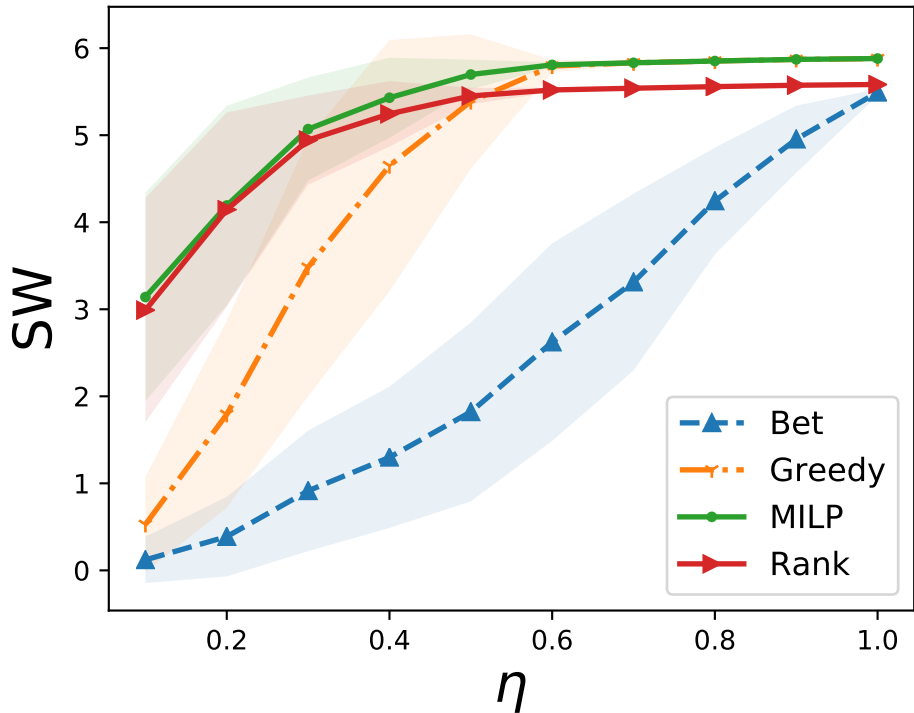

Supplement: supplementary_material [file attachment]

Social Welfare

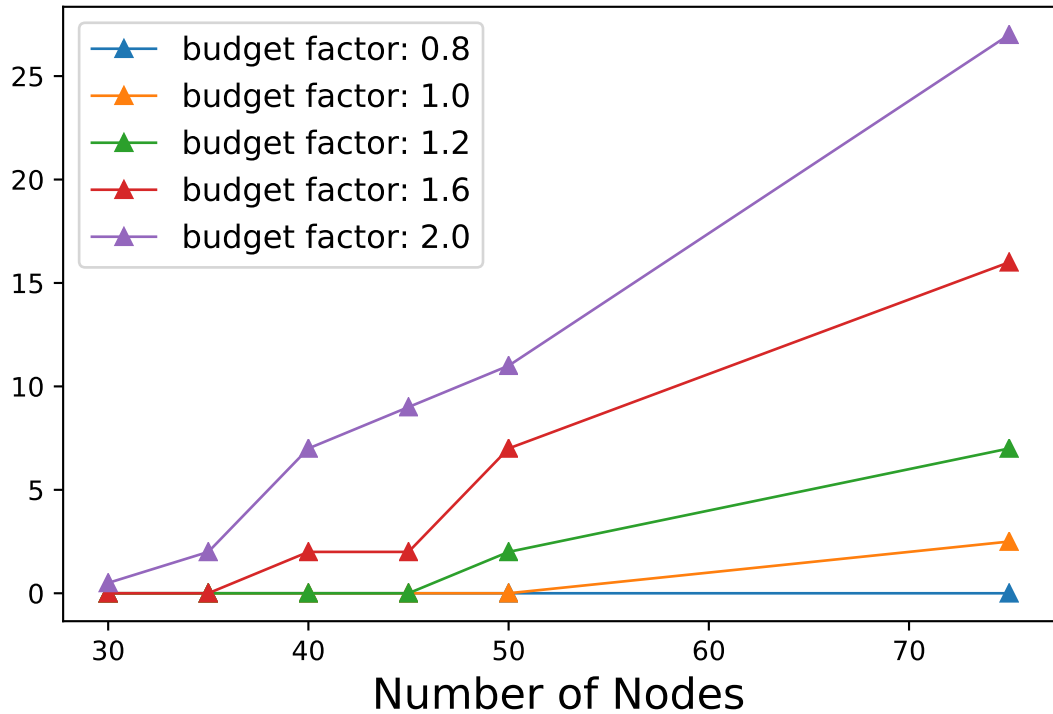

Supplement: supplementary_material [file attachment]
